# Supplementary material
Source: PubMed Central journal article supplement (PMC3807464)
Supplement: JB.00758-13_zjb999092824so1.pdf [file JB.00758-13_zjb999092824so1.pdf]

Table S1: Raw spectral counts

| Identified proteins                                                    | Accession | MW  | ClpC <sup>trap</sup> |      | Empty vector |      |
|------------------------------------------------------------------------|-----------|-----|----------------------|------|--------------|------|
|                                                                        | Number    | kDa | Exp1                 | Exp2 | Exp1         | Exp2 |
| ATP-dependent Clp protease, ATP-binding subunit ClpC                   | A6QEH7    | 91  | 5028                 | 5652 | 49           | 0    |
| 6-phosphofructokinase GN=pfkA                                          | A6QHN3    | 35  | 1484                 | 3580 | 1847         | 3059 |
| 50S ribosomal protein L3 GN=rpLC                                       | A6QJ92    | 24  | 849                  | 1253 | 873          | 1378 |
| Elongation factor Tu GN=tuf                                            | A6QEK0    | 43  | 506                  | 789  | 552          | 987  |
| 50S ribosomal protein L2 GN=rpLB                                       | A6QJ89    | 30  | 500                  | 581  | 516          | 880  |
| DNA-binding response regulator SrrA GN=srrA                            | A6QH40    | 28  | 435                  | 820  | 424          | 796  |
| Formate acetyltransferase GN=pfIB                                      | A6QDK2    | 85  | 413                  | 314  | 94           | 307  |
| FtsK/SpoIIIE (DNA translocase stage III) family protein GN=NWMN_1634   | A6QHS4    | 145 | 376                  | 1858 | 514          | 1726 |
| ATP-dependent Clp protease, ATP-binding subunit ClpB GN=NWMN_0845      | A6QFI5    | 98  | 363                  | 462  | 112          | 361  |
| Pyruvate kinase GN=pykA                                                | A6QHN2    | 63  | 331                  | 361  | 84           | 260  |
| Elongation factor G GN=fusA                                            | A6QEI9    | 77  | 289                  | 127  | 37           | 96   |
| Phosphomevalonate kinase GN=mvaK2                                      | A6QEP5    | 40  | 263                  | 571  | 376          | 586  |
| Probable inorganic polyphosphate/ATP-NAD kinase GN=ppnK                | A6QFL7    | 31  | 188                  | 439  | 360          | 424  |
| 30S ribosomal protein S2 GN=rpsB                                       | A6QGF6    | 29  | 180                  | 153  | 36           | 84   |
| Iron-regulated surface determinant protein A GN=isdA                   | A6QG31    | 39  | 159                  | 271  | 267          | 361  |
| Chaperone protein DnaK GN=dnaK                                         | A6QHC3    | 66  | 158                  | 315  | 33           | 59   |
| FeS assembly protein SufB GN=sufB                                      | A6QFC9    | 53  | 142                  | 105  | 48           | 57   |
| 30S ribosomal protein S19 GN=rpsS                                      | A6QJ88    | 11  | 128                  | 175  | 296          | 264  |
| Probable malate:quinone oxidoreductase 2 GN=mqo2                       | A6QK94    | 56  | 127                  | 137  | 57           | 144  |
| Elastin-binding protein ebpS GN=ebpS                                   | A6QH29    | 53  | 126                  | 143  | 213          | 330  |
| Diaminopimelate decarboxylase GN=sbnH                                  | A6QDA7    | 46  | 122                  | 119  | 115          | 180  |
| 30S ribosomal protein S12 GN=rpsL                                      | A6QEI7    | 15  | 122                  | 64   | 92           | 70   |
| Bifunctional autolysin GN=atl                                          | A6QFR2    | 137 | 117                  | 185  | 55           | 122  |
| DNA-directed RNA polymerase subunit beta GN=rpoB                       | A6QEJ4    | 133 | 111                  | 469  | 40           | 184  |
| Zn-binding lipoprotein adcA-like protein GN=NWMN_2306                  | A6QJP6    | 61  | 106                  | 190  | 197          | 381  |
| Pyruvate dehydrogenase E1 component, beta subunit GN=phdB              | A6QFV0    | 35  | 102                  | 56   | 39           | 20   |
| Asparagine--tRNA ligase GN=asnS                                        | A6QH05    | 49  | 99                   | 53   | 39           | 76   |
| Alkaline shock protein 23 GN=NWMN_2086                                 | A6QJ26    | 19  | 98                   | 120  | 54           | 67   |
| GMP synthase [glutamine-hydrolyzing] GN=guaA                           | A6QE71    | 58  | 96                   | 73   | 34           | 63   |
| ATP-dependent Clp protease, ATP-binding subunit ClpL                   | A6QK38    | 78  | 92                   | 270  | 37           | 128  |
| Putative uncharacterized protein GN=NWMN_1462                          | A6QHA2    | 41  | 92                   | 140  | 144          | 110  |
| UvrB/UvrC motif domain protein GN=NWMN_0485                            | A6QEH5    | 19  | 85                   | 126  | 69           | 109  |
| Glucosamine-fructose-6-phosphate aminotransferase, isomerizing GN=glmS | A6QIZ6    | 66  | 84                   | 97   | 17           | 41   |
| Iron uptake regulatory protein GN=NWMN_1406                            | A6QH46    | 17  | 83                   | 174  | 106          | 237  |
| Bifunctional purine biosynthesis protein PurH GN=purH                  | A6QFT1    | 54  | 81                   | 103  | 71           | 220  |
| Putative uncharacterized protein GN=NWMN_0811                          | A6QFF1    | 44  | 80                   | 51   | 14           | 37   |
| DNA-directed RNA polymerase subunit beta' GN=rpoC                      | A6QEJ5    | 135 | 75                   | 329  | 30           | 157  |
| 50S ribosomal protein L5 GN=rpLE                                       | A6QJ80    | 20  | 75                   | 71   | 12           | 44   |
| Peptidase M20/M25/M40 family protein GN=NWMN_2230                      | A6QJH0    | 41  | 74                   | 112  | 109          | 92   |
| Pyruvate dehydrogenase E1 component, alpha subunit GN=phdA             | A6QFU9    | 41  | 73                   | 46   | 22           | 6    |
| Zinc and cobalt transport repressor protein GN=NWMN_2049               | A6QIY9    | 12  | 71                   | 173  | 76           | 177  |
| Putative uncharacterized protein GN=NWMN_0123                          | A6QDG3    | 273 | 68                   | 802  | 40           | 461  |

|                                                                                        |        |     |    |     |     |     |
|----------------------------------------------------------------------------------------|--------|-----|----|-----|-----|-----|
| Glutamate synthase, large subunit GN=gltB                                              | A6QEC6 | 166 | 65 | 146 | 135 | 337 |
| 30S ribosomal protein S4 GN=rpsD                                                       | A6QHQ3 | 23  | 65 | 87  | 22  | 69  |
| 50S ribosomal protein L16 GN=rplP                                                      | A6QJ85 | 16  | 63 | 327 | 59  | 304 |
| ATP synthase subunit beta GN=atpD                                                      | A6QIU7 | 51  | 63 | 129 | 42  | 100 |
| DNA gyrase subunit A GN=gyrA                                                           | A6QD45 | 100 | 63 | 29  | 0   | 69  |
| Naphthoate synthase GN=memB                                                            | A6QFQ5 | 30  | 62 | 37  | 16  | 26  |
| Dihydrolipoamide acetyltransferase component of pyruvate dehydrogenase complex GN=pdhC | A6QFV1 | 46  | 61 | 84  | 78  | 79  |
| Ferritin GN=NWMN_1831                                                                  | A6QIC1 | 20  | 60 | 21  | 15  | 25  |
| Formate dehydrogenase homolog GN=NWMN_2210                                             | A6QJF0 | 111 | 59 | 112 | 1   | 32  |
| Cell division protein ftsA GN=ftsA                                                     | A6QG85 | 53  | 59 | 89  | 22  | 58  |
| Protein RecA GN=recA                                                                   | A6QGI4 | 38  | 58 | 150 | 16  | 26  |
| L-lactate dehydrogenase 2 GN=ldh2                                                      | A6QK89 | 34  | 58 | 53  | 24  | 43  |
| 50S ribosomal protein L6 GN=rplF                                                       | A6QJ77 | 20  | 57 | 57  | 9   | 47  |
| Putative uncharacterized protein GN=NWMN_0275                                          | A6QDW5 | 30  | 57 | 40  | 36  | 47  |
| Transcriptional regulatory protein walR GN=walR                                        | A6QD57 | 27  | 55 | 129 | 66  | 146 |
| Ribonucleoside-diphosphate reductase GN=nrdE                                           | A6QF40 | 82  | 55 | 97  | 27  | 58  |
| Putative uncharacterized protein GN=NWMN_0364                                          | A6QE54 | 21  | 54 | 77  | 33  | 42  |
| L-lactate dehydrogenase 1 GN=ldh1                                                      | A6QDL6 | 35  | 54 | 16  | 7   | 3   |
| Glycosyl transferase, group 1 family protein GN=NWMN_0527                              | A6QEL7 | 58  | 53 | 44  | 199 | 123 |
| 60 chaperonin GN=groL                                                                  | A6QIM7 | 58  | 50 | 104 | 11  | 33  |
| Ribosome maturation factor RimM GN=rimM                                                | A6QGD9 | 19  | 50 | 96  | 101 | 213 |
| Cell division protein SepF GN=sepF                                                     | A6QG89 | 21  | 49 | 87  | 48  | 113 |
| SsrA-binding protein GN=smpB                                                           | A6QF90 | 18  | 49 | 63  | 30  | 93  |
| RNAIII-activating protein TRAP GN=NWMN_1726                                            | A6QI16 | 20  | 49 | 41  | 56  | 77  |
| Cobalamin synthesis protein, P47K family protein GN=NWMN_0656                          | A6QEZ6 | 35  | 49 | 32  | 31  | 60  |
| Dak phosphatase GN=NWMN_1136                                                           | A6QGC6 | 61  | 48 | 21  | 0   | 13  |
| Tyrosine recombinase xerD GN=xerD                                                      | A6QH45 | 34  | 47 | 159 | 34  | 95  |
| Acetyltransferase, GNAT family protein GN=NWMN_2419                                    | A6QK09 | 11  | 46 | 99  | 96  | 79  |
| Acetate kinase GN=ackA                                                                 | A6QHP5 | 44  | 46 | 67  | 14  | 21  |
| 30S ribosomal protein S3 GN=rpsC                                                       | A6QJ86 | 24  | 45 | 146 | 26  | 88  |
| Glycerophosphoryl diester phosphodiesterase GN=glpQ                                    | A6QFH0 | 35  | 45 | 63  | 14  | 98  |
| Isochorismatase family protein GN=NWMN_1856                                            | A6QIE6 | 21  | 44 | 81  | 89  | 104 |
| Ribose-phosphate pyrophosphokinase GN=prs                                              | A6QEF3 | 35  | 44 | 70  | 4   | 31  |
| Zinc-specific metalloregulatory protein GN=NWMN_1457                                   | A6QH97 | 16  | 44 | 43  | 48  | 38  |
| 2-oxoglutarate dehydrogenase E1 component GN=odhA                                      | A6QGW6 | 105 | 44 | 4   | 32  | 83  |
| Translation initiation factor IF-3 GN=infC                                             | A6QHL4 | 20  | 43 | 29  | 20  | 30  |
| Aspartyl/glutamyl-tRNA(Asn/Gln) amidotransferase subunit B GN=gatB                     | A6QIC7 | 54  | 42 | 47  | 4   | 23  |
| S1 RNA binding domain protein GN=NWMN_1969                                             | A6QIQ9 | 81  | 41 | 4   | 4   | 14  |
| Glutamyl-tRNA(Gln) amidotransferase subunit A GN=gatA                                  | A6QIC8 | 53  | 40 | 113 | 6   | 33  |
| DNA polymerase III subunit beta GN=dnaN                                                | A6QD42 | 42  | 40 | 44  | 4   | 19  |
| Phosphosugar-binding transcriptional regulator RpiR family protein GN=NWMN_2217        | A6QJF7 | 33  | 39 | 437 | 109 | 160 |
| ATP synthase subunit alpha GN=atpA                                                     | A6QIU9 | 55  | 38 | 52  | 48  | 78  |
| Enolase GN=eno                                                                         | A6QF85 | 47  | 38 | 28  | 21  | 13  |
| FeS assembly ATPase SufC GN=sufC                                                       | A6QFC5 | 28  | 37 | 76  | 8   | 17  |
| Chaperone protein DnaJ GN=dnaJ                                                         | A6QHC2 | 42  | 34 | 80  | 6   | 8   |

|                                                                        |        |     |    |     |     |     |
|------------------------------------------------------------------------|--------|-----|----|-----|-----|-----|
| General stress protein-like protein GN=NWMN_1632                       | A6QHS2 | 18  | 33 | 72  | 21  | 43  |
| RNA-metabolising metallo-beta-lactamase GN=NWMN_1184                   | A6QGH4 | 63  | 33 | 42  | 29  | 37  |
| 30S ribosomal protein S7 GN=rpsG                                       | RS7    | 18  | 33 | 17  | 4   | 22  |
| Putative uncharacterized protein GN=NWMN_0078                          | A6QDB8 | 26  | 32 | 121 | 22  | 141 |
| 2-dehydropantoate 2-reductase GN=panE                                  | A6QK87 | 32  | 32 | 80  | 70  | 77  |
| Putative uncharacterized protein GN=NWMN_0601                          | A6QEU1 | 35  | 32 | 38  | 26  | 41  |
| Putative uncharacterized protein GN=NWMN_0526                          | A6QEL6 | 57  | 32 | 34  | 118 | 86  |
| Staphylococcal accessory gene regulator A GN=agrA                      | A6QIN6 | 28  | 31 | 55  | 10  | 29  |
| Sigma 54 modulation protein GN=NWMN_0721                               | A6QF61 | 22  | 31 | 46  | 15  | 28  |
| Iron-containing alcohol dehydrogenase GN=adhE                          | A6QDD4 | 95  | 31 | 28  | 2   | 60  |
| Inosine-5'-monophosphate dehydrogenase GN=guaB                         | A6QE70 | 53  | 30 | 77  | 5   | 19  |
| Uracil phosphoribosyltransferase GN=upp                                | A6QEJ8 | 23  | 30 | 31  | 9   | 24  |
| Nitroreductase family protein GN=NWMN_0373                             | A6QE63 | 29  | 30 | 4   | 19  | 28  |
| Septation ring formation regulator EzrA GN=ezrA                        | A6QHQ1 | 66  | 29 | 55  | 18  | 65  |
| 30S ribosomal protein S1 GN=rpsA                                       | A6QH25 | 43  | 29 | 36  | 13  | 20  |
| ATP-dependent Clp protease proteolytic subunit GN=clpP                 | A6QF76 | 22  | 29 | 34  | 10  | 11  |
| 30S ribosomal protein S10 GN=rpsJ                                      | A6QJ93 | 12  | 29 | 27  | 18  | 27  |
| Putative uncharacterized protein GN=NWMN_0545                          | A6QEN5 | 14  | 28 | 108 | 29  | 119 |
| Staphopain thiol proteinase GN=sspB                                    | A6QID7 | 44  | 28 | 79  | 49  | 68  |
| Ferredoxin--NADP reductase GN=NWMN_2274                                | A6QJL4 | 38  | 28 | 35  | 63  | 47  |
| UPF0358 protein NWMN_0977 GN=NWMN_0977                                 | A6QFW7 | 10  | 28 | 16  | 28  | 35  |
| 30S ribosomal protein S5 GN=rpsE                                       | A6QJ75 | 17  | 27 | 95  | 21  | 68  |
| Putative uncharacterized protein GN=NWMN_1735                          | A6QI25 | 114 | 27 | 43  | 11  | 52  |
| Serine-protein kinase rsbW GN=rsbW                                     | A6QIR1 | 18  | 27 | 40  | 11  | 17  |
| Polyribonucleotide nucleotidyltransferase GN=pnp                       | A6QGH3 | 77  | 27 | 19  | 3   | 14  |
| UPF0365 protein NWMN_1476 GN=NWMN_1476                                 | A6QHB6 | 35  | 26 | 84  | 16  | 85  |
| Putative ATP:guanido phosphotransferase NWMN_0486 GN=NWMN_0486         | A6QEH6 | 39  | 26 | 44  | 15  | 2   |
| Amidophosphoribosyltransferase GN=purF                                 | A6QFS8 | 54  | 26 | 4   | 23  | 115 |
| Quinol oxidase polypeptide II QoxA GN=qoxA                             | A6QF50 | 42  | 25 | 81  | 14  | 51  |
| UDP-N-acetylglucosamine 1-carboxyvinyltransferase 1 GN=murA            | A6QIU4 | 45  | 25 | 79  | 5   | 14  |
| Putative uncharacterized protein GN=NWMN_2250                          | A6QJJ0 | 16  | 25 | 78  | 22  | 55  |
| 30S ribosomal protein S8 GN=rpsH                                       | A6QJ78 | 15  | 25 | 28  | 9   | 4   |
| Proline--tRNA ligase GN=proS                                           | A6QGG3 | 64  | 25 | 28  | 7   | 21  |
| Ferrichrome ABC transporter lipoprotein GN=NWMN_2078                   | A6QJ18 | 37  | 25 | 20  | 3   | 16  |
| 50S ribosomal protein L19 GN=rplS                                      | A6QGE1 | 13  | 25 | 19  | 20  | 34  |
| Dehydrogenase family protein GN=NWMN_2201                              | A6QJE1 | 41  | 25 | 11  | 0   | 0   |
| Small GTP-binding protein domain:GTP-binding protein TypA GN=NWMN_0974 | A6QFW4 | 69  | 25 | 8   | 0   | 7   |
| Translation initiation factor IF-2 GN=infB                             | A6QGG8 | 78  | 24 | 81  | 33  | 93  |
| Putative uncharacterized protein GN=NWMN_0079                          | A6QDB9 | 29  | 24 | 35  | 45  | 82  |
| L-asparaginase GN=ansA                                                 | A6QH27 | 36  | 24 | 32  | 18  | 76  |
| Glycosyl transferase, group 1 family protein GN=NWMN_0906              | A6QFP6 | 57  | 24 | 13  | 56  | 40  |
| Fumarylacetoacetate hydrolase family protein GN=NWMN_0839              | A6QFH9 | 33  | 24 | 6   | 5   | 0   |
| Glycosyl transferase group 2 family protein GN=NWMN_0192               | A6QDN2 | 66  | 23 | 28  | 24  | 22  |
| Cell division protein ftsZ GN=ftsZ                                     | A6QG86 | 41  | 22 | 82  | 15  | 37  |
| 50S ribosomal protein L13 GN=rplM                                      | A6QJ60 | 16  | 22 | 45  | 22  | 66  |

|                                                                              |        |     |    |     |    |     |
|------------------------------------------------------------------------------|--------|-----|----|-----|----|-----|
| Amino acid ABC transporter, amino acid-binding protein<br>GN=NWMN_2313       | A6QJQ3 | 29  | 22 | 30  | 11 | 25  |
| ABC transporter ATP-binding protein GN=NWMN_1303                             | A6QGU3 | 60  | 22 | 19  | 3  | 17  |
| Fructose specific permease GN=fruA                                           | A6QF09 | 69  | 21 | 32  | 19 | 56  |
| Lipoyl synthase GN=lipA                                                      | A6QFD6 | 35  | 21 | 28  | 8  | 14  |
| (3R)-hydroxymyristoyl-[acyl-carrier-protein] dehydratase<br>GN=fabZ          | A6QIU3 | 16  | 21 | 10  | 8  | 4   |
| Transcriptional regulator AraC family protein<br>GN=NWMN_2281                | A6QJM1 | 82  | 20 | 70  | 36 | 59  |
| Putative uncharacterized protein GN=NWMN_1621                                | A6QHR1 | 46  | 20 | 40  | 21 | 49  |
| Arginine--tRNA ligase GN=argS                                                | A6QER9 | 62  | 20 | 0   | 8  | 8   |
| Acetoin utilization protein AcuC GN=acuC                                     | A6QHR8 | 45  | 20 | 26  | 15 | 13  |
| Aldehyde dehydrogenase family protein GN=NWMN_2026                           | A6QIW6 | 52  | 19 | 81  | 10 | 49  |
| GTP-sensing transcriptional pleiotropic repressor CodY                       | A6QGF5 | 29  | 19 | 49  | 11 | 16  |
| Putative uncharacterized protein GN=NWMN_1631                                | A6QHS1 | 55  | 19 | 45  | 16 | 16  |
| Putative uncharacterized protein GN=NWMN_2507                                | A6QK97 | 18  | 19 | 20  | 22 | 28  |
| Sucrose-6-phosphate hydrolase GN=scrB                                        | A6QIN8 | 58  | 19 | 19  | 18 | 24  |
| Putative uncharacterized protein GN=NWMN_1861                                | A6QIF1 | 7   | 19 | 0   | 3  | 0   |
| Carbamoyl-phosphate synthase large chain GN=carB                             | A6QGA4 | 117 | 18 | 119 | 4  | 112 |
| Putative uncharacterized protein GN=NWMN_0814                                | A6QFF4 | 14  | 18 | 87  | 43 | 103 |
| Putative uncharacterized protein GN=NWMN_1119                                | A6QGA9 | 66  | 18 | 39  | 13 | 43  |
| 50S ribosomal protein L1 GN=rplA                                             | A6QEJ0 | 25  | 18 | 32  | 7  | 13  |
| Transcriptional regulator SarA GN=sarA                                       | A6QES8 | 15  | 18 | 10  | 5  | 11  |
| Glyceraldehyde 3-phosphate dehydrogenase 1 GN=gapA                           | A6QF81 | 36  | 17 | 39  | 0  | 0   |
| Phosphosugar-binding transcriptional regulator<br>GN=NWMN_2225               | A6QJG5 | 30  | 17 | 36  | 27 | 37  |
| Serine protease HtrA GN=htrA                                                 | A6QFN2 | 87  | 17 | 27  | 25 | 95  |
| Alkyl hydroperoxide reductase subunit C GN=ahpC                              | A6QE62 | 21  | 17 | 27  | 20 | 32  |
| Putative uncharacterized protein GN=NWMN_0047                                | A6QD87 | 43  | 17 | 25  | 23 | 26  |
| Foldase protein prsA GN=prsA                                                 | A6QI23 | 36  | 17 | 21  | 3  | 15  |
| Aspartate--tRNA ligase GN=aspS                                               | A6QHH2 | 67  | 17 | 7   | 0  | 5   |
| DNA gyrase subunit B GN=gyrB                                                 | A6QD44 | 73  | 17 | 49  | 6  | 28  |
| ATP-dependent zinc metalloprotease FtsH GN=ftsH                              | A6QEG3 | 78  | 17 | 35  | 26 | 176 |
| Transketolase GN=tkt                                                         | A6QGP4 | 72  | 16 | 9   | 1  | 0   |
| MarR family regulatory protein GN=NWMN_2286                                  | A6QJM6 | 17  | 16 | 6   | 2  | 4   |
| 50S ribosomal protein L29 GN=rpmC                                            | A6QJ84 | 9   | 16 | 4   | 4  | 8   |
| Xanthine phosphoribosyltransferase GN=xpt                                    | A6QE68 | 21  | 16 | 60  | 7  | 12  |
| Pseudouridine synthase GN=NWMN_0878                                          | A6QFL8 | 33  | 15 | 53  | 27 | 40  |
| Bifunctional protein pyrR GN=pyrR                                            | A6QG99 | 20  | 15 | 44  | 0  | 10  |
| FeS assembly protein SufD GN=sufD                                            | A6QFC6 | 49  | 15 | 32  | 4  | 16  |
| 50S ribosomal protein L14 GN=rplN                                            | A6QJ82 | 13  | 15 | 22  | 8  | 14  |
| Glucose-6-phosphate 1-dehydrogenase GN=zwf                                   | A6QH52 | 57  | 15 | 16  | 3  | 4   |
| 2-C-methyl-D-erythritol 4-phosphate cytidyltransferase 1<br>GN=ispD1         | A6QDM5 | 27  | 8  | 11  | 0  | 0   |
| 2-C-methyl-D-erythritol 4-phosphate cytidyltransferase 2<br>GN=ispD2         | A6QDM9 | 27  | 3  | 2   | 0  | 1   |
| Iron compound ABC transporter, iron compound-binding<br>protein GN=NWMN_2185 | A6QJC5 | 34  | 15 | 13  | 4  | 10  |
| Alanine--tRNA ligase GN=alaS                                                 | A6QHF9 | 99  | 15 | 10  | 2  | 20  |
| Probable siderophore biosynthesis protein SbnA GN=sbnA                       | A6QDA0 | 36  | 15 | 35  | 10 | 33  |

|                                                                           |        |     |    |     |    |     |
|---------------------------------------------------------------------------|--------|-----|----|-----|----|-----|
| Quinol oxidase polypeptide I QoxB GN=qoxB                                 | A6QFR9 | 75  | 15 | 68  | 17 | 83  |
| Putative uncharacterized protein GN=NWMN_1479                             | A6QHB9 | 51  | 15 | 22  | 0  | 16  |
| Transcription termination-antitermination factor GN=nusA                  | A6QGG6 | 44  | 14 | 21  | 2  | 15  |
| RNA polymerase sigma factor GN=sigA                                       | A6QHA4 | 42  | 14 | 17  | 0  | 4   |
| Acriflavin resistance protein GN=NWMN_2162                                | A6QJA2 | 115 | 14 | 5   | 8  | 30  |
| 50S ribosomal protein L25 GN=rplY                                         | A6QEF4 | 24  | 14 | 31  | 4  | 22  |
| Nitrate reductase, alpha subunit GN=narG                                  | A6QJN7 | 140 | 14 | 193 | 22 | 168 |
| UPF0348 protein NWMN_0989 GN=NWMN_0989                                    | A6QFX9 | 45  | 13 | 109 | 36 | 74  |
| Excinuclease ABC subunit A GN=uvrA                                        | A6QF67 | 105 | 13 | 36  | 4  | 21  |
| Holo-[acyl-carrier-protein] synthase GN=acpS                              | A6QIR6 | 14  | 13 | 35  | 26 | 34  |
| Thioesterase superfamily protein GN=NWMN_1816                             | A6QIA6 | 20  | 13 | 33  | 7  | 55  |
| Universal stress protein family protein GN=NWMN_1600                      | A6QHP0 | 15  | 13 | 27  | 12 | 19  |
| DNA-directed RNA polymerase subunit alpha GN=rpoA                         | A6QJ66 | 35  | 13 | 13  | 0  | 0   |
| Ribonucleotide-diphosphate reductase beta chain GN=nrdF                   | A6QF41 | 38  | 13 | 11  | 2  | 9   |
| D-isomer specific 2-hydroxyacid dehydrogenase family protein GN=NWMN_2205 | A6QJE5 | 35  | 13 | 1   | 1  | 0   |
| Probable manganese transport protein MntH GN=mntH                         | A6QFW1 | 50  | 13 | 7   | 12 | 16  |
| Transcription termination factor Rho GN=rho                               | A6QIW5 | 50  | 12 | 42  | 0  | 13  |
| Site-specific recombinase GN=NWMN_0592                                    | A6QET2 | 21  | 12 | 27  | 3  | 31  |
| Signal peptidase IB GN=spsB                                               | A6QFH6 | 22  | 12 | 19  | 8  | 15  |
| ATP synthase subunit delta GN=atpH                                        | A6QIV0 | 20  | 12 | 10  | 11 | 13  |
| Putative uncharacterized protein GN=NWMN_1336                             | A6QGX6 | 31  | 12 | 9   | 0  | 4   |
| Peptide deformylase 1 GN=pdf1                                             | A6QFU7 | 21  | 12 | 3   | 17 | 13  |
| Sigma factor sigB regulation protein GN=rsbU                              | A6QIR3 | 38  | 11 | 50  | 3  | 8   |
| GTP pyrophosphokinase GN=relA                                             | A6QHH6 | 85  | 11 | 27  | 11 | 24  |
| Putative uncharacterized protein GN=NWMN_2088                             | A6QJ28 | 21  | 11 | 23  | 15 | 27  |
| 50S ribosomal protein L22 GN=rplV                                         | A6QJ87 | 13  | 11 | 11  | 4  | 10  |
| PTS system glucose-specific EIICBA component GN=ptsG                      | A6QDH3 | 74  | 11 | 20  | 7  | 18  |
| Para-aminobenzoate synthase component II GN=pabA                          | A6QF22 | 22  | 11 | 10  | 8  | 13  |
| Putative uncharacterized protein GN=NWMN_0956                             | A6QFU6 | 63  | 10 | 44  | 6  | 21  |
| ATP-dependent protease ATPase subunit HslU GN=hslU                        | A6QGF4 | 52  | 10 | 29  | 1  | 18  |
| 50S ribosomal protein L21 GN=rplU                                         | A6QHI9 | 11  | 10 | 19  | 13 | 17  |
| Ferrichrome ABC transporter lipoprotein GN=NWMN_0705                      | A6QF45 | 38  | 10 | 17  | 4  | 8   |
| Clumping factor A GN=clfA                                                 | Q53653 | 97  | 10 | 17  | 0  | 10  |
| 30S ribosomal protein S17 GN=rpsQ                                         | A6QJ83 | 10  | 10 | 14  | 3  | 20  |
| Alcohol dehydrogenase GN=adh1                                             | A6QER7 | 36  | 10 | 9   | 2  | 0   |
| Lytic regulatory protein GN=NWMN_2051                                     | A6QIZ1 | 41  | 10 | 6   | 4  | 10  |
| Protein translocase subunit SecA 1 GN=secA1                               | A6QF62 | 96  | 10 | 56  | 4  | 72  |
| 50S ribosomal protein L15 GN=rplO                                         | A6QJ73 | 16  | 10 | 6   | 7  | 18  |
| Phosphomethylpyrimidine kinase GN=thiD                                    | A6QEN3 | 30  | 10 | 27  | 0  | 8   |
| Pyruvate oxidase GN=poxB                                                  | A6QK28 | 64  | 10 | 29  | 6  | 40  |
| 3-oxoacyl-[acyl-carrier protein] reductase GN=fabG                        | A6QGD1 | 26  | 10 | 8   | 6  | 10  |
| Transcription factor fapR GN=fapR                                         | A6QGC8 | 22  | 9  | 39  | 18 | 47  |
| Putative uncharacterized protein GN=NWMN_0685                             | A6QF25 | 27  | 9  | 31  | 1  | 19  |
| Putative uncharacterized protein GN=NWMN_1645                             | A6QHT5 | 16  | 9  | 26  | 5  | 14  |
| Succinyl-CoA ligase [ADP-forming] subunit beta GN=sucC                    | A6QGE5 | 42  | 9  | 22  | 0  | 0   |
| UPF0298 protein NWMN_0985 GN=NWMN_0985                                    | A6QFX5 | 10  | 9  | 20  | 3  | 16  |
| ATP synthase subunit b GN=atpF                                            | A6QIV1 | 20  | 9  | 18  | 5  | 12  |
| Lipoprotein GN=NWMN_0782                                                  | A6QFC2 | 30  | 9  | 16  | 5  | 14  |

|                                                                  |        |     |   |    |    |    |
|------------------------------------------------------------------|--------|-----|---|----|----|----|
| Nuclease sbcCD subunit C GN=sbcC                                 | A6QGP8 | 117 | 9 | 15 | 0  | 7  |
| Transcription antitermination protein NusG GN=nusG               | P0C1S3 | 21  | 9 | 12 | 4  | 3  |
| Biotin carboxylase subunit of acetyl-CoA carboxylase GN=accC     | A6QH71 | 50  | 9 | 11 | 0  | 4  |
| Putative uncharacterized protein GN=NWMN_0651                    | A6QEZ1 | 27  | 9 | 7  | 6  | 4  |
| RNA pseudouridylate synthase GN=NWMN_1742                        | A6QI32 | 31  | 9 | 2  | 0  | 5  |
| Putative uncharacterized protein GN=NWMN_1679                    | A6QHW9 | 35  | 9 | 0  | 0  | 3  |
| Putative uncharacterized protein GN=NWMN_1654                    | A6QHU4 | 21  | 9 | 21 | 4  | 30 |
| 50S ribosomal protein L31 type B GN=rpME2                        | A6QIW4 | 10  | 9 | 4  | 0  | 4  |
| Aldo/keto reductase family protein GN=NWMN_0672                  | A6QF12 | 32  | 9 | 0  | 0  | 0  |
| tRNA-specific 2-thiouridylase MnmA GN=mnmA                       | A6QHG3 | 42  | 9 | 6  | 4  | 0  |
| 6-carboxy-5,6,7,8-tetrahydropterin synthase GN=NWMN_0680         | A6QF20 | 16  | 8 | 32 | 7  | 26 |
| Allophanate hydrolase subunit 2 GN=NWMN_0686                     | A6QF26 | 38  | 8 | 25 | 8  | 5  |
| Ribonuclease Z GN=rnz                                            | A6QH51 | 35  | 8 | 15 | 7  | 27 |
| Putative uncharacterized protein GN=NWMN_2037                    | A6QIX7 | 43  | 8 | 13 | 18 | 2  |
| Putative uncharacterized protein GN=NWMN_2356                    | A6QUJ6 | 17  | 8 | 10 | 2  | 3  |
| 4-amino-4-deoxychorismate lyase GN=pabC                          | A6QF24 | 24  | 8 | 9  | 7  | 14 |
| Siderophore compound ABC transporter binding protein GN=sirA     | A6QD99 | 37  | 8 | 9  | 5  | 7  |
| (Dimethylallyl)adenosine tRNA methylthiotransferase MiaB GN=miaB | A6QGJ1 | 59  | 8 | 14 | 0  | 12 |
| Phosphoglycerate kinase GN=pgk                                   | A6QF82 | 43  | 8 | 12 | 3  | 0  |
| Putative uncharacterized protein GN=NWMN_1102                    | A6QG92 | 24  | 8 | 6  | 0  | 0  |
| 50S ribosomal protein L17 GN=rpLQ                                | A6QJ65 | 14  | 8 | 13 | 7  | 14 |
| CTP synthase GN=pyrG                                             | A6QIX1 | 60  | 8 | 8  | 4  | 10 |
| Lysine--tRNA ligase GN=lysS                                      | A6QEG9 | 59  | 8 | 30 | 3  | 16 |
| Alkyl hydroperoxide reductase subunit F GN=ahpF                  | A6QE61 | 55  | 8 | 20 | 0  | 3  |
| Ribonuclease Y GN=rny                                            | A6QGI5 | 59  | 8 | 29 | 9  | 26 |
| DNA mismatch repair protein MutS GN=mutS                         | A6QGJ4 | 100 | 8 | 13 | 2  | 9  |
| 30S ribosomal protein S16 GN=rpsP                                | A6QGD8 | 10  | 8 | 11 | 4  | 4  |
| Catabolite control protein A GN=ccpA                             | A6QHR9 | 36  | 8 | 15 | 0  | 3  |
| Pantothenate synthetase GN=panC                                  | A6QK85 | 31  | 8 | 2  | 0  | 2  |
| Tyrosine recombinase XerC GN=xerC                                | A6QGF2 | 35  | 7 | 72 | 3  | 19 |
| Transcriptional regulator CtsR GN=ctsR                           | A6QEH4 | 18  | 7 | 29 | 2  | 8  |
| Accessory secretory protein Asp1 GN=NWMN_2551                    | A6QKE1 | 61  | 7 | 24 | 17 | 34 |
| Putative uncharacterized protein GN=NWMN_0632                    | A6QEX2 | 24  | 7 | 11 | 1  | 6  |
| DNA repair protein RecN GN=recN                                  | A6QH65 | 64  | 7 | 11 | 0  | 4  |
| Putative uncharacterized protein GN=NWMN_1730                    | A6QI20 | 13  | 7 | 10 | 1  | 4  |
| Putative uncharacterized protein GN=NWMN_0299                    | A6QDY9 | 21  | 7 | 9  | 1  | 12 |
| Serine-aspartate repeat-containing protein E GN=sdrE             | O86489 | 127 | 7 | 2  | 9  | 1  |
| 2-isopropylmalate synthase GN=leuA                               | A6QIQ3 | 56  | 7 | 1  | 11 | 15 |
| Methionyl-tRNA formyltransferase GN=fmt                          | A6QGB6 | 34  | 7 | 0  | 0  | 0  |
| 2-oxoisovalerate dehydrogenase, E2 component GN=NWMN_1421        | A6QH61 | 47  | 7 | 12 | 4  | 3  |
| Phosphoribosylformylglycinamide synthase 2 GN=purL               | A6QFS7 | 80  | 7 | 38 | 0  | 59 |
| Pur operon repressor GN=purR                                     | A6QEE9 | 30  | 7 | 30 | 4  | 2  |
| Uridylate kinase GN=pyrH                                         | A6QGF8 | 26  | 7 | 10 | 1  | 2  |
| Hydrolase GN=NWMN_0584                                           | A6QES4 | 31  | 7 | 7  | 0  | 0  |
| Putative uncharacterized protein GN=NWMN_2087                    | A6QJ27 | 9   | 7 | 5  | 0  | 3  |
| Formate--tetrahydrofolate ligase GN=fhs                          | A6QHR5 | 60  | 7 | 7  | 3  | 14 |

|                                                                                                                             |        |     |   |    |    |    |
|-----------------------------------------------------------------------------------------------------------------------------|--------|-----|---|----|----|----|
| Putative uncharacterized protein GN=NWMN_0976                                                                               | A6QFW6 | 19  | 7 | 8  | 1  | 3  |
| Putative uncharacterized protein GN=NWMN_1504                                                                               | A6QHE4 | 48  | 6 | 33 | 34 | 27 |
| Carboxyl-terminal protease GN=ctpA                                                                                          | A6QGX2 | 55  | 6 | 10 | 14 | 20 |
| Putative uncharacterized protein GN=NWMN_0191                                                                               | A6QDN1 | 66  | 6 | 10 | 6  | 6  |
| Lipoprotein GN=NWMN_0428                                                                                                    | A6QEB8 | 30  | 6 | 5  | 4  | 1  |
| Putative uncharacterized protein GN=NWMN_2063                                                                               | A6QJ03 | 35  | 6 | 5  | 8  | 0  |
| Putative uncharacterized protein GN=NWMN_0272                                                                               | A6QDW2 | 21  | 6 | 8  | 0  | 0  |
| Teichoic acid biosynthesis protein D GN=tagD                                                                                | A6QEV1 | 16  | 6 | 8  | 3  | 8  |
| UDP-N-acetylglucosamine--N-acetylmuramyl-(pentapeptide) pyrophosphoryl-undecaprenol N-acetylglucosamine transferase GN=murG | A6QGX0 | 40  | 6 | 18 | 0  | 2  |
| Methicillin resistance protein FemA GN=femA                                                                                 | A6QGS6 | 49  | 6 | 11 | 5  | 3  |
| Cysteine synthase GN=NWMN_0475                                                                                              | A6QEG5 | 33  | 6 | 14 | 0  | 1  |
| 2-oxoisovalerate dehydrogenase, E1 component, beta subunit GN=NWMN_1422                                                     | A6QH62 | 36  | 6 | 13 | 0  | 1  |
| UPF0042 nucleotide-binding protein NWMN_0733 GN=NWMN_0733                                                                   | A6QF73 | 35  | 6 | 6  | 1  | 4  |
| S-adenosylmethionine synthase GN=metK                                                                                       | A6QHX0 | 44  | 6 | 28 | 4  | 7  |
| ATP-dependent Clp protease ATP-binding subunit ClpX                                                                         | A6QHK8 | 46  | 6 | 18 | 8  | 11 |
| Bifunctional protein Fold GN=fold                                                                                           | A6QFS2 | 31  | 6 | 13 | 0  | 1  |
| Inositol-1-monophosphatase family protein GN=NWMN_0973                                                                      | A6QFW3 | 30  | 6 | 11 | 0  | 4  |
| UPF0637 protein NWMN_0972 GN=NWMN_0972                                                                                      | A6QFW2 | 24  | 6 | 9  | 4  | 5  |
| Chromosome partition protein Smc GN=smc                                                                                     | A6QGD4 | 137 | 5 | 61 | 0  | 15 |
| Phosphoribosylaminoimidazole-succinocarboxamide synthase GN=purC                                                            | A6QFS5 | 27  | 5 | 18 | 0  | 4  |
| 50S ribosomal protein L10 GN=rplJ                                                                                           | A6QEJ1 | 18  | 5 | 15 | 0  | 13 |
| ABC transporter ATP-binding protein GN=NWMN_0613                                                                            | A6QEV3 | 64  | 5 | 10 | 8  | 26 |
| 30S ribosomal protein S13 GN=rpsM                                                                                           | A6QJ68 | 14  | 5 | 10 | 2  | 10 |
| Pyruvate carboxylase GN=pycA                                                                                                | A6QFW9 | 129 | 5 | 8  | 0  | 0  |
| SbnI protein GN=sbnI                                                                                                        | A6QDA8 | 30  | 5 | 5  | 9  | 18 |
| Oligopeptide permease, peptide-binding protein GN=opp1A                                                                     | A6QJV4 | 60  | 5 | 2  | 5  | 2  |
| Peptide methionine sulfoxide reductase MsrA 2 GN=msrA                                                                       | A6QGX5 | 21  | 5 | 2  | 0  | 1  |
| Putative uncharacterized protein GN=NWMN_0576                                                                               | A6QER6 | 20  | 5 | 9  | 0  | 8  |
| 50S ribosomal protein L30 GN=rpmD                                                                                           | A6QJ74 | 7   | 5 | 6  | 8  | 10 |
| Glucokinase GN=glk                                                                                                          | A6QH91 | 35  | 5 | 7  | 0  | 0  |
| Enoyl-[acyl-carrier-protein] reductase [NADPH] GN=NWMN_0881                                                                 | A6QFM1 | 28  | 5 | 13 | 5  | 1  |
| Oxidoreductase GN=NWMN_0657                                                                                                 | A6QEZ7 | 35  | 5 | 0  | 5  | 9  |
| Putative uncharacterized protein GN=NWMN_0119                                                                               | A6QDF9 | 38  | 5 | 6  | 4  | 0  |
| Redox-sensing transcriptional repressor rex GN=rax                                                                          | A6QIP3 | 24  | 5 | 8  | 0  | 2  |
| Trigger factor GN=tig                                                                                                       | A6QHK9 | 49  | 5 | 2  | 3  | 5  |
| Putative uncharacterized protein GN=NWMN_1135                                                                               | A6QGC5 | 13  | 5 | 7  | 4  | 11 |
| 50S ribosomal protein L27 GN=rpmA                                                                                           | A6QHI7 | 10  | 5 | 4  | 0  | 4  |
| Phage cI-like repressor GN=NWMN_1921                                                                                        | A6QIL1 | 27  | 5 | 4  | 1  | 1  |
| Putative uncharacterized protein GN=NWMN_1820                                                                               | A6QIB0 | 10  | 5 | 2  | 0  | 0  |
| 50S ribosomal protein L4 GN=rplD                                                                                            | A6QJ91 | 22  | 5 | 12 | 7  | 17 |
| 50S ribosomal protein L35 GN=rpmI                                                                                           | A6QHL3 | 8   | 5 | 7  | 5  | 12 |
| Universal stress protein family protein GN=NWMN_1604                                                                        | A6QHP4 | 18  | 5 | 28 | 3  | 20 |
| Isocitrate dehydrogenase [NADP] GN=citC                                                                                     | A6QHM7 | 46  | 5 | 10 | 0  | 0  |
| Anaerobic ribonucleoside-triphosphate reductase GN=nrdD                                                                     | A6QKA5 | 70  | 5 | 24 | 12 | 11 |

|                                                                                  |        |    |   |     |    |    |
|----------------------------------------------------------------------------------|--------|----|---|-----|----|----|
| Ferrichrome transport ATP-binding protein fhuA GN=fhuA                           | A6QEV6 | 29 | 5 | 3   | 6  | 2  |
| 30S ribosomal protein S20 GN=rpsT                                                | A6QHC8 | 9  | 5 | 17  | 2  | 12 |
| Ribosomal RNA small subunit methyltransferase H GN=rsmH                          | A6QG79 | 36 | 5 | 7   | 0  | 3  |
| Flavoheмоprotein GN=NWMN_0175                                                    | A6QDL5 | 43 | 0 | 11  | 0  | 0  |
| 65 membrane protein GN=NWMN_1872                                                 | A6QIG2 | 66 | 4 | 12  | 8  | 34 |
| Penicillin-binding protein 3 GN=pbpC                                             | A6QH95 | 77 | 4 | 9   | 5  | 24 |
| Putative uncharacterized protein GN=NWMN_0369                                    | A6QE59 | 24 | 4 | 8   | 1  | 4  |
| Phenylalanine--tRNA ligase beta subunit GN=pheT                                  | A6QG40 | 89 | 4 | 3   | 0  | 9  |
| 2-succinyl-5-enolpyruvyl-6-hydroxy-3-cyclohexene-1-carboxylate synthase GN=mendD | A6QFQ3 | 63 | 4 | 1   | 2  | 8  |
| Branched-chain-amino-acid aminotransferase GN=ilvE                               | A6QEK6 | 40 | 4 | 2   | 2  | 0  |
| Penicillin binding protein 2 GN=pbpB                                             | A6QH01 | 80 | 4 | 21  | 5  | 39 |
| ABC transporter permease protein GN=NWMN_0691                                    | A6QF31 | 56 | 4 | 0   | 2  | 1  |
| Putative uncharacterized protein GN=NWMN_1127                                    | A6QGB7 | 50 | 4 | 7   | 7  | 0  |
| Putative uncharacterized protein GN=NWMN_0270                                    | A6QDW0 | 10 | 4 | 9   | 8  | 26 |
| 50S ribosomal protein L28 GN=rpmB                                                | A6QGC4 | 7  | 4 | 8   | 2  | 13 |
| 1-acyl-sn-glycerol-3-phosphate acyltransferase GN=plsC                           | A6QHR0 | 23 | 4 | 13  | 2  | 5  |
| UDP-N-acetylenolpyruvylglucosamine reductase GN=murB                             | A6QF47 | 34 | 4 | 0   | 0  | 0  |
| Threonine--tRNA ligase GN=thrS                                                   | A6QHL6 | 74 | 4 | 57  | 0  | 22 |
| 33 chaperonin GN=hsI0                                                            | A6QEG4 | 32 | 4 | 8   | 5  | 2  |
| Staphylococcal accessory regulator R GN=sarR                                     | A6QJD5 | 14 | 4 | 3   | 0  | 3  |
| Chorismate synthase GN=aroC                                                      | A6QH17 | 43 | 4 | 1   | 1  | 0  |
| Staphylococcal tandem lipoprotein GN=lpl9nm                                      | A6QEA2 | 31 | 4 | 2   | 2  | 0  |
| Putative uncharacterized protein GN=NWMN_1648                                    | A6QHT8 | 46 | 4 | 16  | 12 | 16 |
| 50S ribosomal protein L18 GN=rplR                                                | A6QJ76 | 13 | 4 | 12  | 4  | 20 |
| Putative uncharacterized protein GN=NWMN_2511                                    | A6QKA1 | 22 | 4 | 3   | 0  | 0  |
| Putative uncharacterized protein GN=NWMN_0737                                    | A6QF77 | 34 | 4 | 6   | 0  | 3  |
| Cell cycle protein GpsB GN=gpsB                                                  | A6QGZ6 | 13 | 4 | 20  | 0  | 2  |
| Uridine kinase GN=udk                                                            | A6QHF2 | 24 | 4 | 6   | 0  | 4  |
| Deoxyribose-phosphate aldolase 1 GN=dra                                          | A6QDC2 | 23 | 4 | 3   | 1  | 0  |
| Putative uncharacterized protein GN=NWMN_1324                                    | A6QGW4 | 30 | 4 | 7   | 2  | 16 |
| Putative uncharacterized protein GN=NWMN_0355                                    | A6QE45 | 41 | 4 | 31  | 3  | 15 |
| Superoxide dismutase GN=sodA                                                     | A6QH96 | 23 | 4 | 9   | 0  | 12 |
| Putative uncharacterized protein GN=NWMN_0274                                    | A6QDW4 | 33 | 4 | 20  | 7  | 11 |
| Putative uncharacterized protein GN=NWMN_2270                                    | A6QJL0 | 23 | 4 | 10  | 4  | 4  |
| Dihydrolipoyl dehydrogenase GN=pdhD                                              | A6QFV2 | 49 | 4 | 122 | 4  | 6  |
| Ornithine cyclodeaminase GN=sbnB                                                 | A6QDA1 | 38 | 4 | 6   | 0  | 3  |
| NADH-dependent flavin oxidoreductase Oye family protein GN=NWMN_0315             | A6QE05 | 45 | 3 | 8   | 14 | 0  |
| Polyribonucleotide nucleotidyltransferase GN=NWMN_0470                           | A6QEG0 | 15 | 3 | 8   | 3  | 10 |
| Putative uncharacterized protein GN=NWMN_1187                                    | A6QGH7 | 49 | 3 | 2   | 0  | 0  |
| ABC transporter, ATP-binding protein GN=NWMN_0343                                | A6QE33 | 32 | 3 | 2   | 1  | 2  |
| Protein GlcT GN=glcT                                                             | A6QGR0 | 33 | 3 | 32  | 1  | 15 |
| Propeptide, PepSY amd peptidase M4 GN=NWMN_1639                                  | A6QHS9 | 12 | 3 | 4   | 0  | 0  |
| D-isomer specific 2-hydroxyacid dehydrogenase GN=NWMN_0801                       | A6QFE1 | 35 | 3 | 31  | 14 | 19 |
| UPF0154 protein NWMN_1255 GN=NWMN_1255                                           | A6QGP5 | 11 | 3 | 3   | 2  | 0  |
| Putative uncharacterized protein GN=NWMN_1746                                    | A6QI36 | 22 | 3 | 5   | 0  | 5  |
| Sortase A, peptide LPXTG peptidoglycan transferase GN=srtA                       | A6QK16 | 24 | 3 | 5   | 1  | 2  |



|                                                                  |        |     |   |    |    |    |
|------------------------------------------------------------------|--------|-----|---|----|----|----|
| Holliday junction ATP-dependent DNA helicase RuvA GN=ruvA        | A6QHI4 | 22  | 3 | 4  | 2  | 1  |
| Acetyltransferase, GNAT family protein GN=NWMN_2468              | A6QK58 | 19  | 3 | 4  | 0  | 0  |
| Putative uncharacterized protein GN=NWMN_0495                    | A6QEI5 | 20  | 3 | 1  | 0  | 0  |
| Putative uncharacterized protein GN=NWMN_0187                    | A6QDM7 | 66  | 3 | 11 | 2  | 8  |
| Transaldolase GN=NWMN_1672                                       | A6QHW2 | 26  | 3 | 1  | 0  | 0  |
| Putative uncharacterized protein GN=NWMN_2164                    | A6QJA4 | 30  | 3 | 4  | 2  | 3  |
| Glycerol uptake operon antiterminator regulatory protein GN=glpP | A6QGJ6 | 20  | 3 | 5  | 0  | 8  |
| Putative uncharacterized protein GN=NWMN_1265                    | A6QGQ5 | 11  | 3 | 2  | 0  | 0  |
| Serine acetyltransferase GN=cysE                                 | A6QEI1 | 24  | 3 | 5  | 4  | 5  |
| Putative uncharacterized protein GN=NWMN_0284                    | A6QDX4 | 21  | 3 | 5  | 0  | 0  |
| 50S ribosomal protein L20 GN=rplT                                | A6QHL2 | 14  | 3 | 13 | 0  | 8  |
| Putative uncharacterized protein GN=NWMN_2352                    | A6QJU2 | 28  | 3 | 4  | 4  | 9  |
| Methicillin resistance expression factor FemB GN=femB            | A6QGS7 | 50  | 3 | 11 | 0  | 0  |
| Fructosamine kinase family protein GN=NWMN_2487                  | A6QK77 | 33  | 3 | 8  | 3  | 8  |
| Putative uncharacterized protein GN=NWMN_2283                    | A6QJM3 | 13  | 3 | 23 | 5  | 23 |
| Glycerol kinase GN=glpK                                          | A6QGJ8 | 56  | 3 | 28 | 0  | 8  |
| ATP synthase gamma chain GN=atpG                                 | A6QIU8 | 32  | 3 | 5  | 5  | 14 |
| Putative uncharacterized protein GN=NWMN_2045                    | A6QIY5 | 53  | 3 | 12 | 6  | 9  |
| Hydrolase GN=NWMN_1210                                           | A6QGK0 | 35  | 3 | 4  | 0  | 10 |
| Capsular polysaccharide synthesis enzyme CapB GN=capB            | A6QDD6 | 26  | 3 | 8  | 0  | 6  |
| Putative uncharacterized protein GN=NWMN_0948                    | A6QFT8 | 20  | 3 | 26 | 0  | 17 |
| Penicillin-binding protein 1 GN=pbpA                             | A6QG81 | 83  | 3 | 1  | 2  | 35 |
| Peptidase M20/M25/M40 family protein GN=NWMN_1644                | A6QHT4 | 53  | 3 | 4  | 1  | 6  |
| HPr kinase/phosphorylase GN=hprK                                 | A6QF68 | 34  | 3 | 7  | 0  | 0  |
| Aspartate transaminase GN=NWMN_1871                              | A6QIG1 | 48  | 3 | 4  | 0  | 1  |
| Preprotein translocase component SecDF GN=secDF                  | A6QHH9 | 84  | 3 | 5  | 6  | 14 |
| Pyrimidine nucleoside phosphorylase GN=pdp                       | A6QIY0 | 46  | 3 | 26 | 2  | 7  |
| Bifunctional protein GlmU GN=gcaD                                | A6QEF2 | 49  | 3 | 6  | 4  | 11 |
| ABC transporter, ATP-binding protein GN=NWMN_2412                | A6QK02 | 26  | 3 | 3  | 1  | 5  |
| Glycerol-3-phosphate dehydrogenase [NAD(P)+] GN=gpsA             | A6QH23 | 36  | 3 | 8  | 0  | 0  |
| SpoU rRNA Methylase family protein GN=NWMN_1048                  | A6QG38 | 27  | 3 | 6  | 0  | 2  |
| Alkylhydroperoxidase AhpD family protein GN=NWMN_2371            | A6QJW1 | 16  | 3 | 5  | 0  | 6  |
| Aerobic glycerol-3-phosphate dehydrogenase GN=glpD               | A6QGJ9 | 64  | 3 | 38 | 17 | 42 |
| Putative uncharacterized protein GN=NWMN_0954                    | A6QFU4 | 24  | 3 | 4  | 0  | 0  |
| Abortive infection protein family protein GN=NWMN_2236           | A6QJH6 | 47  | 3 | 5  | 4  | 12 |
| 5' nucleotidase family protein GN=NWMN_0894                      | A6QFN4 | 58  | 3 | 3  | 0  | 6  |
| ATP-binding Mrp/Nbp35 family protein GN=NWMN_2067                | A6QJ07 | 38  | 3 | 10 | 0  | 0  |
| Single-stranded DNA-binding protein GN=NWMN_0358                 | A6QE48 | 19  | 0 | 4  | 0  | 0  |
| D-3-phosphoglycerate dehydrogenase GN=serA                       | A6QHQ7 | 58  | 2 | 22 | 2  | 15 |
| Probable manganese-dependent inorganic pyrophosphatase GN=ppaC   | A6QIE7 | 34  | 2 | 9  | 1  | 1  |
| Ribosomal RNA large subunit methyltransferase H GN=rlmH          | A6QD63 | 18  | 2 | 8  | 0  | 4  |
| Uroporphyrinogen decarboxylase GN=hemE                           | A6QI15 | 39  | 2 | 5  | 0  | 2  |
| Hippurate hydrolase GN=hipO                                      | A6QGU9 | 43  | 2 | 10 | 15 | 2  |
| Preprotein translocase, YajC subunit GN=NWMN_1540                | A6QHI0 | 10  | 2 | 9  | 0  | 4  |
| DNA polymerase III, alpha subunit GN=dnaE                        | A6QHN7 | 123 | 2 | 4  | 0  | 5  |
| Alanine racemase 1 GN=alr2                                       | A6QGV0 | 41  | 2 | 3  | 5  | 3  |
| GTPase obg GN=obg                                                | A6QHI6 | 47  | 2 | 19 | 1  | 8  |

|                                                                                                   |        |     |   |    |   |    |
|---------------------------------------------------------------------------------------------------|--------|-----|---|----|---|----|
| 30S ribosomal protein S11 GN=rpsK                                                                 | A6QJ67 | 14  | 2 | 22 | 4 | 36 |
| Putative uncharacterized protein GN=NWMN_2209                                                     | A6QJE9 | 17  | 2 | 4  | 0 | 0  |
| Iron compound ABC transporter, iron compound-binding protein GN=NWMN_0581                         | A6QES1 | 33  | 2 | 4  | 0 | 0  |
| Dihydrolipoamide succinyltransferase E2 component of 2-oxoglutarate dehydrogenase complex GN=sucB | A6QGW5 | 47  | 2 | 7  | 0 | 0  |
| Capsular polysaccharide type 5 biosynthesis protein cap5A GN=cap5A                                | P95695 | 25  | 2 | 6  | 0 | 12 |
| DNA polymerase GN=polA                                                                            | A6QHM3 | 99  | 2 | 5  | 1 | 35 |
| ABC transporter ATP-binding protein GN=NWMN_1867                                                  | A6QIF7 | 33  | 2 | 0  | 0 | 6  |
| Amino acid ABC transporter, permease protein GN=NWMN_2312                                         | A6QJQ2 | 26  | 2 | 4  | 0 | 0  |
| Putative uncharacterized protein GN=NWMN_2434                                                     | A6QK24 | 37  | 2 | 6  | 0 | 1  |
| Transcriptional regulator LysR family protein GN=NWMN_2441                                        | A6QK31 | 34  | 2 | 72 | 9 | 32 |
| Protein esaA GN=esaA                                                                              | P0C049 | 115 | 2 | 5  | 0 | 17 |
| Zinc-containing alcohol dehydrogenase superfamily protein GN=NWMN_2272                            | A6QJL2 | 37  | 2 | 5  | 1 | 0  |
| Glutamate dehydrogenase GN=gudB                                                                   | A6QFG8 | 47  | 2 | 10 | 6 | 0  |
| Putative uncharacterized protein GN=NWMN_1317                                                     | A6QGV7 | 44  | 2 | 8  | 1 | 0  |
| DNA polymerase III polC-type GN=polC                                                              | A6QGG4 | 163 | 2 | 28 | 0 | 5  |
| Serine/threonine-protein kinase PrkC GN=prkC                                                      | A6QGC0 | 74  | 2 | 0  | 5 | 15 |
| GTPase Der GN=der                                                                                 | A6QH24 | 49  | 2 | 5  | 2 | 2  |
| Tyrosine--tRNA ligase GN=tyrS                                                                     | A6QHR2 | 48  | 2 | 3  | 0 | 1  |
| 30S ribosomal protein S6 GN=rpsF                                                                  | A6QE47 | 12  | 2 | 8  | 6 | 16 |
| 30S ribosomal protein S9 GN=rpsI                                                                  | A6QJ59 | 15  | 2 | 5  | 3 | 3  |
| Putative uncharacterized protein GN=NWMN_1612                                                     | A6QHQ2 | 17  | 2 | 2  | 0 | 2  |
| Phage cI-like repressor GN=NWMN_0994                                                              | A6QFY4 | 27  | 2 | 1  | 3 | 6  |
| DNA-binding response regulator VraR GN=vraR                                                       | A6QIB2 | 24  | 2 | 8  | 2 | 3  |
| Amino acid ABC transporter, ATP-binding protein GN=NWMN_2311                                      | A6QJQ1 | 27  | 2 | 5  | 0 | 7  |
| Putative uncharacterized protein GN=NWMN_0958                                                     | A6QFU8 | 24  | 2 | 2  | 2 | 5  |
| Phosphopantothencysteine decarboxylase GN=coaBC                                                   | A6QGB1 | 44  | 2 | 3  | 1 | 0  |
| Oligoendopeptidase F GN=NWMN_0870                                                                 | A6QFL0 | 70  | 2 | 3  | 1 | 4  |
| MarR family regulatory protein GN=NWMN_0655                                                       | A6QEZ5 | 17  | 2 | 7  | 0 | 5  |
| Putative uncharacterized protein GN=NWMN_2335                                                     | A6QJS5 | 25  | 2 | 13 | 5 | 17 |
| Putative uncharacterized protein GN=NWMN_1381                                                     | A6QH21 | 22  | 2 | 3  | 0 | 0  |
| NAD-dependent epimerase/dehydratase GN=NWMN_2375                                                  | A6QJW5 | 25  | 2 | 2  | 0 | 0  |
| DNA polymerase III gamma subunit GN=dnaX                                                          | A6QED2 | 63  | 2 | 16 | 0 | 5  |
| ATP-dependent RNA helicase DEAD box family protein GN=NWMN_1985                                   | A6QIS5 | 57  | 2 | 17 | 0 | 13 |
| Glucose-6-phosphate isomerase GN=pgi                                                              | A6QFH3 | 50  | 2 | 3  | 0 | 2  |
| Protein SprT-like GN=NWMN_1968                                                                    | A6QIQ8 | 18  | 2 | 20 | 6 | 16 |
| Chromosomal replication initiator protein DnaA GN=dnaA                                            | A6QD41 | 52  | 2 | 14 | 0 | 5  |
| Thiol-disulphide oxidoreductase, DCC family protein GN=NWMN_2044                                  | A6QIY4 | 16  | 2 | 8  | 3 | 8  |
| Glutamate-1-semialdehyde 2,1-aminomutase 2 GN=hemL2                                               | A6QI46 | 47  | 2 | 6  | 0 | 0  |
| Serine hydroxymethyltransferase GN=glyA                                                           | A6QIV7 | 45  | 2 | 7  | 0 | 7  |
| Staphylococcal respiratory response protein SrrB GN=srrB                                          | A6QH39 | 66  | 2 | 0  | 0 | 8  |
| Putative uncharacterized protein GN=NWMN_2285                                                     | A6QJM5 | 14  | 0 | 8  | 3 | 4  |
| 50S ribosomal protein L23 GN=rplW                                                                 | A6QJ90 | 11  | 0 | 5  | 1 | 6  |

|                                                                           |        |     |   |    |   |    |
|---------------------------------------------------------------------------|--------|-----|---|----|---|----|
| Phosphoribosylformylglycinamide cyclo-ligase GN=purM                      | A6QFS9 | 37  | 0 | 7  | 0 | 0  |
| Assimilatory nitrite reductase [NAD(P)H], large subunit GN=nirB           | A6QJP0 | 89  | 0 | 0  | 0 | 13 |
| Cardiolipin synthase 1 GN=cls1                                            | A6QGM0 | 57  | 0 | 1  | 0 | 5  |
| Nitric oxide synthase oxygenase GN=NWMN_1852                              | A6QIE2 | 42  | 0 | 1  | 4 | 3  |
| Aldo/keto reductase family protein GN=NWMN_1408                           | A6QH48 | 33  | 0 | 14 | 0 | 18 |
| Putative uncharacterized protein GN=NWMN_0375                             | A6QE65 | 36  | 0 | 24 | 2 | 23 |
| Putative uncharacterized protein GN=NWMN_2332                             | A6QJS2 | 26  | 1 | 3  | 0 | 4  |
| Protein nrdI GN=nrdI                                                      | A6QF39 | 15  | 1 | 2  | 0 | 4  |
| Molybdenum ABC transporter, periplasmic molybdate-binding protein GN=modA | A6QJB9 | 29  | 1 | 14 | 0 | 10 |
| Signal recognition particle protein GN=ffh                                | A6QGD7 | 51  | 1 | 13 | 0 | 16 |
| Putative uncharacterized protein GN=NWMN_0522                             | A6QEL2 | 21  | 1 | 3  | 2 | 0  |
| Homoserine dehydrogenase GN=metL                                          | A6QGN0 | 47  | 1 | 4  | 0 | 1  |
| Adapter protein mecA GN=mecA                                              | A6QFK8 | 28  | 1 | 8  | 0 | 0  |
| Putative uncharacterized protein GN=NWMN_2282                             | A6QJM2 | 16  | 1 | 7  | 0 | 4  |
| Putative uncharacterized protein GN=NWMN_2002                             | A6QIU2 | 19  | 1 | 5  | 0 | 0  |
| Putative uncharacterized protein GN=NWMN_1430                             | A6QH70 | 13  | 1 | 4  | 0 | 1  |
| ATP synthase epsilon chain GN=atpC                                        | A6QIU6 | 15  | 1 | 0  | 2 | 3  |
| ABC transporter ATP-binding protein GN=NWMN_1459                          | A6QH99 | 29  | 1 | 7  | 0 | 6  |
| Putative TrmH family tRNA/rRNA methyltransferase GN=NWMN_0494             | Q9AGT0 | 27  | 1 | 5  | 0 | 2  |
| Putative uncharacterized protein GN=NWMN_2405                             | A6QJZ5 | 27  | 1 | 2  | 0 | 0  |
| Isoleucine--tRNA ligase GN=ileS                                           | A6QG93 | 105 | 1 | 6  | 0 | 0  |
| Phosphoenolpyruvate-protein phosphotransferase GN=NWMN_0950               | A6QFU0 | 63  | 1 | 11 | 0 | 10 |
| Replicative DNA helicase GN=dnaB                                          | A6QD55 | 53  | 1 | 9  | 0 | 5  |
| Peptide chain release factor 3 GN=prfC                                    | A6QFN0 | 60  | 1 | 21 | 0 | 13 |
| Pseudouridine synthase GN=NWMN_1646                                       | A6QHT6 | 27  | 1 | 18 | 6 | 17 |
| Succinate dehydrogenase flavoprotein subunit GN=sdhA                      | A6QG51 | 66  | 1 | 2  | 0 | 9  |
| Fructose-bisphosphate aldolase GN=fbaA                                    | A6QIW9 | 31  | 1 | 3  | 0 | 0  |
| Putative uncharacterized protein GN=NWMN_0615                             | A6QEV5 | 30  | 0 | 0  | 0 | 3  |
| D-alanine-activating DltD protein GN=dltD                                 | A6QFE6 | 45  | 0 | 4  | 0 | 0  |
| Siderophore biosynthesis lucC family protein GN=sbnF                      | A6QDA5 | 72  | 0 | 0  | 0 | 5  |
| Putative uncharacterized protein GN=NWMN_0874                             | A6QFL4 | 23  | 0 | 3  | 0 | 0  |
| Riboflavin biosynthesis protein ribF GN=ribF                              | A6QGH1 | 37  | 0 | 2  | 0 | 0  |
| Lactose phosphotransferase system repressor GN=lacR                       | A6QJ40 | 29  | 0 | 16 | 8 | 15 |
| Dihydropteroate synthase chain A GN=folP                                  | A6QEG6 | 29  | 0 | 7  | 0 | 2  |
| Secretory antigen SsaA GN=NWMN_2199                                       | A6QJD9 | 29  | 0 | 8  | 0 | 0  |
| Glutamine synthetase GN=glnA                                              | A6QGK7 | 51  | 0 | 4  | 0 | 0  |
| Probable glycine dehydrogenase [decarboxylating] subunit 2 GN=gcvPB       | A6QH79 | 55  | 0 | 22 | 0 | 2  |
| Putative uncharacterized protein GN=NWMN_1848                             | A6QID8 | 13  | 0 | 3  | 0 | 3  |
| Oxidoreductase family protein GN=NWMN_0321                                | A6QE11 | 38  | 0 | 11 | 0 | 0  |
| tRNA uridine 5-carboxymethylaminomethyl modification enzyme MnmG GN=mnmG  | A6QKK1 | 70  | 0 | 3  | 0 | 0  |
| Phage integrase GN=int                                                    | A6QIA4 | 41  | 0 | 2  | 0 | 0  |
| Tryptophanyl-tRNA synthetase GN=trpS                                      | A6QFK6 | 37  | 0 | 3  | 0 | 0  |
| Putative Holliday junction resolvase GN=NWMN_1517                         | A6QHF7 | 16  | 0 | 4  | 0 | 0  |
| Putative uncharacterized protein GN=NWMN_0641                             | A6QEY1 | 33  | 0 | 9  | 0 | 0  |

|                                                                      |        |     |   |    |    |    |
|----------------------------------------------------------------------|--------|-----|---|----|----|----|
| UPF0753 protein NWMN_0419 GN=NWMN_0419                               | A6QEA9 | 103 | 0 | 8  | 0  | 18 |
| 30S ribosomal protein S15 GN=rpsO                                    | A6QGH2 | 11  | 0 | 9  | 7  | 14 |
| CamS sex pheromone cAM373 GN=camS                                    | A6QID1 | 45  | 0 | 10 | 0  | 2  |
| Aldehyde dehydrogenase GN=NWMN_1858                                  | A6QIE8 | 52  | 0 | 31 | 6  | 22 |
| Glycine betaine/L-proline transport ATP-binding subunit GN=opuCA     | A6QJT7 | 46  | 0 | 13 | 0  | 0  |
| Transcriptional regulator AraC family protein GN=NWMN_2198           | A6QJD8 | 76  | 0 | 13 | 10 | 14 |
| Putative uncharacterized protein GN=NWMN_0116                        | A6QDF6 | 28  | 0 | 10 | 0  | 8  |
| DNA topoisomerase IV, A subunit GN=parC                              | A6QGQ8 | 91  | 0 | 4  | 0  | 15 |
| ATP-dependent RNA helicase DEAD/DEAH box family protein GN=NWMN_1461 | A6QHA1 | 51  | 0 | 10 | 2  | 5  |
| D-alanine--D-alanine ligase GN=ddl                                   | A6QIS7 | 40  | 0 | 8  | 0  | 0  |
| Putative uncharacterized protein GN=NWMN_0264                        | A6QDV4 | 37  | 0 | 6  | 0  | 2  |
| UDP-N-acetylmuramate--L-alanine ligase GN=murC                       | A6QHS3 | 49  | 0 | 15 | 1  | 5  |
| Putative uncharacterized protein GN=NWMN_2243                        | A6QJI3 | 25  | 0 | 0  | 0  | 2  |
| 50S ribosomal protein L7/L12 GN=rpL                                  | A6QEJ2 | 13  | 0 | 2  | 0  | 0  |
| Tributyryl esterase GN=estA                                          | A6QKB8 | 29  | 0 | 6  | 0  | 10 |
| Putative uncharacterized protein GN=NWMN_0925                        | A6QFR5 | 46  | 0 | 2  | 5  | 1  |
| UDP-N-acetylglucosamine 2-epimerase GN=capG                          | A6QDE1 | 43  | 0 | 5  | 0  | 0  |
| Glyceraldehyde 3-phosphate dehydrogenase 2 GN=gapB                   | A6QHM0 | 37  | 0 | 6  | 0  | 0  |
| Para-nitrobenzyl esterase chain A GN=NWMN_2350                       | A6QJU0 | 52  | 0 | 8  | 0  | 7  |
| ABC transporter ATP-binding protein GN=NWMN_0603                     | A6QEU3 | 28  | 0 | 8  | 4  | 9  |
| Urease subunit gamma GN=ureA                                         | A6QJC8 | 11  | 0 | 8  | 4  | 13 |
| Putative uncharacterized protein GN=NWMN_1924                        | A6QIL4 | 18  | 0 | 3  | 0  | 0  |
| S-ribosylhomocysteine lyase GN=luxS                                  | A6QIX8 | 18  | 0 | 1  | 4  | 9  |
| Putative uncharacterized protein GN=NWMN_0671                        | A6QF11 | 51  | 0 | 3  | 1  | 8  |
| Putative uncharacterized protein GN=NWMN_0520                        | A6QEL0 | 17  | 0 | 3  | 0  | 0  |
| Peptidoglycan pentaglycine interpeptide biosynthesis protein GN=fmhB | A6QJA3 | 49  | 0 | 8  | 0  | 5  |
| DNA translocase FtsK/SpoIIIE family protein GN=ftsK                  | A6QGH5 | 88  | 0 | 0  | 0  | 10 |
| Ribose transcriptional repressor RbsR GN=rbsR                        | A6QDP5 | 37  | 0 | 18 | 6  | 7  |
| Aspartate carbamoyltransferase GN=pyrB                               | A6QGA1 | 33  | 0 | 3  | 0  | 0  |
| Cardiolipin synthase 2 GN=cls                                        | A6QIT2 | 57  | 0 | 2  | 2  | 3  |
| HTH-type transcriptional regulator SarS GN=sarS                      | A6QD96 | 30  | 0 | 3  | 1  | 1  |
| Phosphate starvation-induced protein, PhoH homolog GN=phoH           | A6QHB4 | 35  | 0 | 5  | 0  | 0  |
| Transcriptional antiterminator BglG family protein GN=NWMN_2539      | A6QKC9 | 73  | 0 | 9  | 0  | 16 |
| Thioredoxin GN=trxA                                                  | A6QG47 | 11  | 0 | 3  | 0  | 4  |
| Phage repressor GN=NWMN_1812                                         | A6QIA2 | 24  | 0 | 6  | 0  | 0  |
| Putative uncharacterized protein GN=NWMN_0267                        | A6QDV7 | 19  | 0 | 5  | 2  | 6  |
| Putative uncharacterized protein GN=NWMN_0190                        | A6QDN0 | 38  | 0 | 4  | 0  | 2  |
| Protein EssC GN=essC                                                 | P0C048 | 171 | 0 | 21 | 0  | 8  |
| Ribonuclease R GN=rnr                                                | A6QF89 | 90  | 0 | 0  | 1  | 9  |
| Transcriptional regulator Fur family protein GN=NWMN_1753            | A6QI43 | 17  | 0 | 9  | 3  | 17 |
| GTPase Era GN=era                                                    | A6QHB0 | 34  | 0 | 4  | 0  | 0  |
| UvrABC system protein B GN=uvrB                                      | A6QF66 | 77  | 0 | 11 | 0  | 2  |
| Cell-division initiation protein GN=divIC                            | A6QEF9 | 15  | 0 | 4  | 0  | 2  |
| Putative uncharacterized protein GN=NWMN_1237                        | A6QGM7 | 33  | 0 | 3  | 2  | 11 |

|                                                                            |        |     |   |    |   |    |
|----------------------------------------------------------------------------|--------|-----|---|----|---|----|
| CBS domain DNA-binding protein GN=NWMN_1599                                | A6QHN9 | 49  | 0 | 8  | 0 | 0  |
| Putative uncharacterized protein GN=NWMN_0984                              | A6QFX4 | 35  | 0 | 7  | 0 | 3  |
| Phage exonuclease GN=NWMN_1922                                             | A6QIL2 | 36  | 0 | 10 | 2 | 3  |
| Capsular polysaccharide synthesis enzyme CapC GN=capC                      | A6QDD7 | 29  | 0 | 7  | 0 | 0  |
| Acetyl-coenzyme A carboxylase carboxyl transferase subunit beta GN=accD    | A6QHN5 | 32  | 0 | 7  | 0 | 2  |
| ATPase AAA family protein GN=NWMN_1529                                     | A6QHG9 | 47  | 0 | 5  | 1 | 0  |
| Choline dehydrogenase GN=betA                                              | A6QK99 | 64  | 0 | 23 | 4 | 4  |
| Transcription-repair coupling factor GN=mfd                                | A6QEF6 | 134 | 0 | 23 | 0 | 9  |
| Putative uncharacterized protein GN=NWMN_0013                              | A6QD53 | 74  | 0 | 3  | 0 | 2  |
| Dihydroorotate dehydrogenase GN=pyrD                                       | A6QK78 | 40  | 0 | 2  | 0 | 0  |
| N-acetylmuramoyl-L-alanine amidase domain protein GN=NWMN_2543             | A6QKD3 | 69  | 0 | 9  | 0 | 7  |
| ABC transporter, ATP-binding protein GN=NWMN_2353                          | A6QJU3 | 25  | 0 | 8  | 0 | 2  |
| DNA replication and repair protein RecF GN=recF                            | A6QD43 | 42  | 0 | 5  | 0 | 0  |
| Putative uncharacterized protein GN=NWMN_1098                              | A6QG88 | 26  | 0 | 2  | 0 | 0  |
| Nitrite reductase transcriptional regulator NirR GN=nirR                   | A6QJP1 | 28  | 0 | 3  | 0 | 1  |
| tRNA modification GTPase MnmE GN=mnmE                                      | A6QKK2 | 51  | 0 | 10 | 0 | 2  |
| Threonine dehydratase II GN=ilvA                                           | A6QGY8 | 37  | 0 | 12 | 0 | 0  |
| Putative uncharacterized protein GN=NWMN_0024                              | A6QD64 | 68  | 0 | 6  | 0 | 0  |
| AraC family regulatory protein GN=NWMN_0636                                | A6QEX6 | 84  | 0 | 9  | 0 | 11 |
| Serine--tRNA ligase GN=serS                                                | A6QD48 | 49  | 0 | 2  | 0 | 0  |
| Putative uncharacterized protein GN=NWMN_2591                              | A6QKI1 | 18  | 0 | 4  | 0 | 0  |
| Alkaline phosphatase synthesis transcriptional regulatory protein GN=phoP  | A6QHM6 | 27  | 0 | 6  | 0 | 0  |
| Respiratory nitrate reductase, delta subunit GN=narJ                       | A6QJN5 | 23  | 0 | 4  | 0 | 5  |
| RpiR family transcriptional regulator GN=NWMN_0137                         | A6QDH7 | 33  | 0 | 6  | 0 | 1  |
| Superoxide dismutase GN=sodM                                               | A6QDB7 | 23  | 0 | 3  | 0 | 3  |
| ABC transporter, ATP-binding protein GN=NWMN_1954                          | A6QIP4 | 74  | 0 | 10 | 0 | 0  |
| Phosphate acyltransferase GN=plsX                                          | A6QGC9 | 35  | 0 | 4  | 0 | 0  |
| PTS system, fructose-specific IIABC component GN=NWMN_2540                 | A6QKD0 | 70  | 0 | 54 | 9 | 55 |
| Urease accessory protein UreE GN=ureE                                      | A6QJD1 | 17  | 0 | 35 | 6 | 43 |
| Leukocidin/hemolysin toxin family S subunit GN=lukS                        | A6QIL8 | 40  | 0 | 28 | 1 | 5  |
| Competence transcription factor ComK homolog GN=comK                       | A6QFN5 | 23  | 0 | 20 | 2 | 7  |
| DNA topoisomerase IV, B subunit GN=parE                                    | A6QGQ7 | 74  | 0 | 18 | 0 | 3  |
| Diapolycopene oxygenase GN=crtP                                            | Q53589 | 57  | 0 | 18 | 0 | 0  |
| Leukocidin/hemolysin toxin family F subunit GN=lukF                        | A6QIL7 | 39  | 0 | 17 | 0 | 3  |
| Putative uncharacterized protein GN=NWMN_0273                              | A6QDW3 | 26  | 0 | 17 | 0 | 1  |
| UDP-N-acetylmuramyl tripeptide synthetase GN=NWMN_1830                     | A6QIC0 | 49  | 0 | 16 | 3 | 7  |
| Putative uncharacterized protein GN=NWMN_0046                              | A6QD86 | 88  | 0 | 16 | 0 | 6  |
| Putative uncharacterized protein GN=NWMN_0201                              | A6QDP1 | 28  | 0 | 12 | 0 | 6  |
| Capsular polysaccharide synthesis enzyme O-acetyl transferase CapH GN=capH | A6QDE2 | 23  | 0 | 11 | 0 | 3  |
| 30S ribosomal protein S14 GN=rpsN                                          | A6QGN8 | 11  | 0 | 11 | 0 | 5  |
| ATP-dependent DNA helicase GN=pcrA                                         | A6QID3 | 84  | 0 | 10 | 0 | 4  |
| Transcriptional repressor NrdR GN=nrdR                                     | A6QHL9 | 18  | 0 | 10 | 0 | 2  |
| Histidine--tRNA ligase GN=hisS                                             | A6QHH3 | 48  | 0 | 9  | 4 | 0  |
| Putative uncharacterized protein GN=NWMN_0011                              | A6QD51 | 37  | 0 | 9  | 0 | 6  |
| Arginine repressor GN=argR                                                 | A6QH66 | 17  | 0 | 9  | 0 | 0  |

|                                                                                    |        |     |   |   |   |    |
|------------------------------------------------------------------------------------|--------|-----|---|---|---|----|
| Siderophore biosynthesis lucA family protein GN=sbnE                               | A6QDA4 | 66  | 0 | 8 | 0 | 7  |
| Folypolyglutamate synthase GN=folC                                                 | A6QHJ7 | 48  | 0 | 7 | 0 | 2  |
| Putative uncharacterized protein GN=NWMN_1947                                      | A6QIN7 | 35  | 0 | 7 | 0 | 0  |
| Putative uncharacterized protein GN=NWMN_1351                                      | A6QGZ1 | 133 | 0 | 7 | 0 | 4  |
| Elongation factor 4 GN=lepA                                                        | A6QHC7 | 68  | 0 | 7 | 0 | 9  |
| Putative uncharacterized protein GN=NWMN_1736                                      | A6QI26 | 46  | 0 | 6 | 2 | 9  |
| Putative uncharacterized protein GN=NWMN_0451                                      | A6QEE1 | 28  | 0 | 6 | 2 | 2  |
| Putative uncharacterized protein GN=NWMN_1322                                      | A6QGW2 | 29  | 0 | 6 | 0 | 2  |
| Putative uncharacterized protein GN=NWMN_1739                                      | A6QI29 | 18  | 0 | 6 | 0 | 0  |
| Type II pantothenate kinase GN=coaW                                                | A6QIX4 | 29  | 0 | 6 | 0 | 0  |
| Putative uncharacterized protein GN=NWMN_1855                                      | A6QIE5 | 41  | 0 | 6 | 0 | 1  |
| Ribonuclease 3 GN=rnc                                                              | A6QGD3 | 28  | 0 | 6 | 0 | 0  |
| Teichoic acid translocation ATP-binding protein GN=tagH                            | A6QEU7 | 30  | 0 | 6 | 0 | 2  |
| Carbamoyl-phosphate synthase small chain GN=pyrAA                                  | A6QGA3 | 40  | 0 | 6 | 0 | 6  |
| Glutamate racemase GN=murl                                                         | A6QG53 | 30  | 0 | 5 | 0 | 0  |
| Aerobactin biosynthesis lucA/lucC family protein<br>GN=NWMN_2080                   | A6QJ20 | 67  | 0 | 5 | 0 | 7  |
| Oligopeptide ABC transporter, ATP-binding protein<br>GN=NWMN_0143                  | A6QDI3 | 59  | 0 | 5 | 0 | 7  |
| Putative uncharacterized protein GN=NWMN_0625                                      | A6QEW5 | 17  | 0 | 5 | 0 | 5  |
| DNA repair protein radA GN=radA                                                    | A6QEH8 | 50  | 0 | 5 | 0 | 2  |
| Putative uncharacterized protein GN=NWMN_2223                                      | A6QJG3 | 20  | 0 | 5 | 0 | 0  |
| Cell division protein FtsQ GN=ftsQ                                                 | A6QG84 | 50  | 0 | 5 | 2 | 14 |
| Glycine--tRNA ligase GN=glyQS                                                      | A6QHA8 | 54  | 0 | 5 | 2 | 3  |
| Oxidoreductase GN=NWMN_1678                                                        | A6QHW8 | 31  | 0 | 5 | 0 | 0  |
| Exonuclease GN=NWMN_1832                                                           | A6QIC2 | 21  | 0 | 5 | 0 | 2  |
| Thymidylate kinase GN=tmk                                                          | A6QED6 | 24  | 0 | 5 | 0 | 0  |
| Putative uncharacterized protein GN=NWMN_2553                                      | A6QKE3 | 228 | 0 | 5 | 0 | 0  |
| Putative uncharacterized protein GN=NWMN_0300                                      | A6QDZ0 | 19  | 0 | 5 | 0 | 0  |
| Octanoyltransferase LipM GN=lipM                                                   | A6QH77 | 32  | 0 | 5 | 0 | 3  |
| Putative uncharacterized protein GN=NWMN_2035                                      | A6QIX5 | 26  | 0 | 5 | 0 | 1  |
| Peptidase M22, glycoprotease GN=NWMN_1958                                          | A6QIP8 | 26  | 0 | 5 | 0 | 0  |
| Putative uncharacterized protein GN=NWMN_1929                                      | A6QIL9 | 48  | 0 | 5 | 0 | 0  |
| 4'-phosphopantetheinyl transferase superfamily protein<br>GN=NWMN_0124             | A6QDG4 | 25  | 0 | 5 | 0 | 2  |
| Methylenetetrahydrofolate--tRNA-(uracil-5-)-methyltransferase<br>TrmFO GN=trmFO    | A6QGF1 | 48  | 0 | 4 | 0 | 5  |
| Putative uncharacterized protein GN=NWMN_0585                                      | A6QES5 | 19  | 0 | 4 | 0 | 0  |
| Putative uncharacterized protein GN=NWMN_0269                                      | A6QDV9 | 10  | 0 | 4 | 0 | 5  |
| Biofilm operon icaADBC HTH-type negative transcriptional<br>regulator IcaR GN=icaR | A6QKF4 | 22  | 0 | 4 | 0 | 1  |
| Putative pyruvate, phosphate dikinase regulatory protein<br>GN=NWMN_1466           | A6QHA6 | 31  | 0 | 4 | 0 | 0  |
| Dehydrosqualene desaturase GN=crtN                                                 | O07855 | 57  | 0 | 4 | 0 | 0  |
| Probable cell wall amidase lytH GN=NWMN_1534                                       | A6QHH4 | 33  | 0 | 4 | 0 | 5  |
| ATP-dependent DNA helicase RecG GN=recG                                            | A6QGC7 | 78  | 0 | 4 | 0 | 0  |
| Putative uncharacterized protein GN=NWMN_0987                                      | A6QFX7 | 20  | 0 | 4 | 0 | 1  |
| Putative uncharacterized protein GN=NWMN_1197                                      | A6QGI7 | 30  | 0 | 4 | 4 | 5  |
| 67 Myosin-crossreactive streptococcal antigen homolog<br>GN=NWMN_0050              | A6QD90 | 68  | 0 | 3 | 0 | 0  |

|                                                           |        |     |   |   |   |   |
|-----------------------------------------------------------|--------|-----|---|---|---|---|
| Small heat shock protein Hsp20 GN=NWMN_2287               | A6QJM7 | 16  | 0 | 3 | 1 | 0 |
| Methionyl-tRNA synthetase GN=metS                         | A6QEE3 | 75  | 0 | 3 | 0 | 0 |
| Truncated MHC class II analog protein GN=NWMN_2109        | A6QJ49 | 15  | 0 | 3 | 0 | 0 |
| Putative uncharacterized protein GN=NWMN_0376             | A6QE66 | 26  | 0 | 3 | 0 | 0 |
| Putative uncharacterized protein GN=NWMN_0775             | A6QFB5 | 14  | 0 | 3 | 0 | 4 |
| Putative uncharacterized protein GN=NWMN_0271             | A6QDW1 | 30  | 0 | 3 | 0 | 0 |
| Monooxygenase family protein GN=NWMN_2206                 | A6QJE6 | 42  | 0 | 3 | 0 | 0 |
| Putative uncharacterized protein GN=NWMN_0666             | A6QF06 | 18  | 0 | 3 | 0 | 0 |
| Putative lipid kinase NWMN_0695 GN=NWMN_0695              | A6QF35 | 34  | 0 | 3 | 0 | 0 |
| Capsular polysaccharide biosynthesis protein CapM GN=capM | A6QDE7 | 21  | 0 | 3 | 0 | 1 |
| ABC transporter, substrate-binding protein GN=NWMN_0173   | A6QDL3 | 55  | 0 | 3 | 0 | 2 |
| Undecaprenyl pyrophosphate synthetase GN=uppS             | A6QGG0 | 30  | 0 | 3 | 0 | 0 |
| Adenine phosphoribosyltransferase GN=apt                  | A6QHH7 | 19  | 0 | 3 | 0 | 0 |
| Putative uncharacterized protein GN=NWMN_0422             | A6QEB2 | 27  | 0 | 3 | 0 | 0 |
| Putative uncharacterized protein GN=NWMN_0325             | A6QE15 | 74  | 0 | 2 | 0 | 0 |
| Putative uncharacterized protein GN=NWMN_0163             | A6QDK3 | 28  | 0 | 2 | 0 | 2 |
| Immunodominant antigen B GN=isaB                          | A6QKC7 | 19  | 0 | 2 | 0 | 0 |
| Peptidase U32 family protein GN=NWMN_1513                 | A6QHF3 | 48  | 0 | 2 | 0 | 0 |
| Potassium-transporting ATPase C chain GN=kdpC             | A6QIS0 | 21  | 0 | 2 | 0 | 1 |
| Putative uncharacterized protein GN=NWMN_0649             | A6QEY9 | 21  | 0 | 2 | 0 | 0 |
| Putative uncharacterized protein GN=NWMN_0809             | A6QFE9 | 39  | 0 | 2 | 0 | 0 |
| Ribonuclease BN GN=NWMN_1821                              | A6QIB1 | 46  | 0 | 2 | 3 | 0 |
| Teichoic acid biosynthesis protein A GN=tagA              | A6QEU6 | 29  | 0 | 2 | 0 | 0 |
| tRNA (guanine-N(7)-)-methyltransferase GN=trmB            | A6QHT1 | 25  | 0 | 2 | 0 | 3 |
| Putative uncharacterized protein GN=NWMN_0575             | A6QER5 | 51  | 0 | 2 | 2 | 0 |
| Cytosol aminopeptidase GN=ampA                            | A6QFF2 | 54  | 0 | 2 | 0 | 2 |
| Staphyloxanthin biosynthesis protein GN=NWMN_0218         | A6QDQ8 | 33  | 0 | 1 | 3 | 6 |
| Putative uncharacterized protein GN=NWMN_0222             | A6QDR2 | 52  | 0 | 1 | 3 | 0 |
| Putative uncharacterized protein GN=NWMN_2386             | A6QJX6 | 110 | 0 | 0 | 0 | 3 |
| MutS2 protein GN=mutS2                                    | MUTS2  | 89  | 0 | 0 | 0 | 6 |
| Membrane protein insertase YidC GN=yidC                   | A6QIT4 | 34  | 0 | 0 | 4 | 6 |
| Putative uncharacterized protein GN=NWMN_0354             | A6QE44 | 32  | 0 | 0 | 4 | 2 |
| UPF0316 protein NWMN_1849 GN=NWMN_1849                    | A6QID9 | 23  | 0 | 0 | 2 | 3 |
| N-acetyltransferase family protein GN=NWMN_2596           | A6QKI6 | 30  | 0 | 0 | 1 | 4 |
| Copper-exporting P-type ATPase A GN=copA                  | A6QK47 | 87  | 0 | 0 | 0 | 3 |
| DNA topoisomerase GN=topA                                 | A6QGF0 | 79  | 0 | 0 | 0 | 2 |
| Putative uncharacterized protein GN=NWMN_1477             | A6QHB7 | 26  | 0 | 0 | 0 | 2 |
